# Supplementary material for: Comparison of three different exercise training modalities (aerobic, strength and mixed) in patients with schizophrenia: study protocol for a multicentre randomised wait-list controlled trial
Source: HighWire-hosted journal article supplement (doi:10.1136/bmjopen-2020-046216), 2021-09-01
Supplement: bmjopen-2020-046216supp002_data_supplement.pdf [file bmjopen-2020-046216supp002_data_supplement.pdf]

## ALL ITEMS FROM THE WORLD HEALTH ORGANIZATION TRIAL REGISTRATION DATA SET

| Data category                                 | Information                                                                                                                                                                                              |
|-----------------------------------------------|----------------------------------------------------------------------------------------------------------------------------------------------------------------------------------------------------------|
| Primary registry and trial identifying number | <i>ClinicalTrials.gov<br/>NCT04987151</i>                                                                                                                                                                |
| Date of registration in primary registry      | <i>July 26, 2021</i>                                                                                                                                                                                     |
| Secondary identifying numbers                 | -                                                                                                                                                                                                        |
| Source(s) of monetary or material support     | <i>The study is not funded</i>                                                                                                                                                                           |
| Primary sponsor                               | <i>The study is not funded</i>                                                                                                                                                                           |
| Secondary sponsor(s)                          | <i>The study is not funded</i>                                                                                                                                                                           |
| Contact for public queries                    | -                                                                                                                                                                                                        |
| Contact for scientific queries                | -                                                                                                                                                                                                        |
| Public title                                  | <i>Comparison of three different exercise training modalities (aerobic, strength, and mixed) in patients with schizophrenia: study protocol for a multi-centre randomised wait-list controlled trial</i> |
| Scientific title                              | <i>Comparison of three different exercise training modalities (aerobic, strength, and mixed) in patients with schizophrenia: study protocol for a multi-centre randomised wait-list controlled trial</i> |
| Countries of recruitment                      | <i>Spain</i>                                                                                                                                                                                             |
| Health condition(s) or problem(s) studied     | <i>Exercise training; Schizophrenia</i>                                                                                                                                                                  |

| Data category                        | Information                                                                                                                                                                                                                                                                                                                                                                                                                                                                                                                                                                        |
|--------------------------------------|------------------------------------------------------------------------------------------------------------------------------------------------------------------------------------------------------------------------------------------------------------------------------------------------------------------------------------------------------------------------------------------------------------------------------------------------------------------------------------------------------------------------------------------------------------------------------------|
| Intervention(s)                      | <i>Three physical exercise programs: strength, aerobic, and mixed (strength and aerobic)</i>                                                                                                                                                                                                                                                                                                                                                                                                                                                                                       |
| Key inclusion and exclusion criteria | <p><i>Inclusion criteria: (1) age between 18–65 years; (2) Diagnostic and Statistical Manual of Mental Disorders, 5th Edition (DSM-5) diagnosis of schizophrenia; and (3) able to read and understand the Spanish language.</i></p> <p><i>Exclusion criteria: (1) acute suicidality; (2) representing an acute danger to others; (3) other psychiatric diagnoses or acute psychiatric illnesses; (4) other disorders that could prevent the person from completing the exercise training; (5) participation in similar programs or interventions at the time of enrolment.</i></p> |
| Study type                           | <p><i>Interventional</i></p> <p><i>Allocation: randomized</i></p> <p><i>Intervention model: simple allocation strategy</i></p> <p><i>Masking: single-blinded (evaluator)</i></p> <p><i>Primary purpose: prevention</i></p> <p><i>Phase III</i></p>                                                                                                                                                                                                                                                                                                                                 |
| Date of first enrolment              | <i>October 2021</i>                                                                                                                                                                                                                                                                                                                                                                                                                                                                                                                                                                |
| Target sample size                   | <i>105</i>                                                                                                                                                                                                                                                                                                                                                                                                                                                                                                                                                                         |
| Recruitment status                   | <i>Not recruiting</i>                                                                                                                                                                                                                                                                                                                                                                                                                                                                                                                                                              |
| Primary outcome(s)                   | <i>Positive symptomatology, negative symptomatology, and general symptomatology (using the Positive and Negative Syndrome Scale)</i>                                                                                                                                                                                                                                                                                                                                                                                                                                               |
| Key secondary outcomes               | <i>Body composition (by assessing body mass index, body fat mass and waist circumference), physical activity levels (International Physical Activity Questionnaire-Short Form), and quality of life (abbreviated World Health Organization Quality of Life questionnaire).</i>                                                                                                                                                                                                                                                                                                     |
