# Supplementary material for: Comparison of three different exercise training modalities (aerobic, strength and mixed) in patients with schizophrenia: study protocol for a multicentre randomised wait-list controlled trial
Source: HighWire-hosted journal article supplement (doi:10.1136/bmjopen-2020-046216), 2021-09-01
Supplement: bmjopen-2020-046216supp004_data_supplement.pdf [file bmjopen-2020-046216supp004_data_supplement.pdf]

| Table 1. Proforma CERT assessment form                                                                                                                                                                                 |                                                                                   |                         |                                                 |         |  |
|------------------------------------------------------------------------------------------------------------------------------------------------------------------------------------------------------------------------|-----------------------------------------------------------------------------------|-------------------------|-------------------------------------------------|---------|--|
| Author and year                                                                                                                                                                                                        |                                                                                   |                         |                                                 |         |  |
| Title: <a href="#">Comparison of three different exercise training modalities (aerobic, strength, and mixed) in patients with schizophrenia: study protocol for a multi-centre randomised wait-list clinical trial</a> |                                                                                   |                         |                                                 |         |  |
| Journal: <a href="#">BMJ Open</a>                                                                                                                                                                                      |                                                                                   |                         |                                                 |         |  |
| Study Location: <a href="#">Spain</a>                                                                                                                                                                                  |                                                                                   |                         |                                                 |         |  |
| Reviewer and date                                                                                                                                                                                                      |                                                                                   |                         |                                                 |         |  |
| Item                                                                                                                                                                                                                   | Description                                                                       | Data extraction details | Location (pg, URL, etc)                         | Yes, No |  |
| 1                                                                                                                                                                                                                      | Detailed description of the type of exercise equipment                            |                         | Pages 8-9, rows 180-218                         |         |  |
| 2                                                                                                                                                                                                                      | Detailed description of the qualifications, expertise and/or training             |                         | <a href="#">Pages 7, Row 173-174</a>            |         |  |
| 3                                                                                                                                                                                                                      | Describe whether exercises are performed individually or in a group               |                         | Page 7, Row 169, 172                            |         |  |
| 4                                                                                                                                                                                                                      | Describe whether exercises are supervised or unsupervised; how they are delivered |                         | Page 7, Rows 172-175<br>Page 12, Rows 272-275   |         |  |
| 5                                                                                                                                                                                                                      | Detailed description of how adherence to exercise is measured and reported        |                         | Page 7, Rows 174-175<br>Page 12, Rows 272-275   |         |  |
| 6                                                                                                                                                                                                                      | Detailed description of motivation strategies                                     |                         | Page 7-8, Rows 176-177<br>Page 12, Rows 272-274 |         |  |
| 7a                                                                                                                                                                                                                     | Detailed description of the decision rule(s) for determining exercise progression |                         | Pages 8-9, rows 180-218<br>Fig 1 and Fig 2      |         |  |
| 7b                                                                                                                                                                                                                     | Detailed description of how the exercise program was progressed                   |                         | Pages 8-9, rows 180-218<br>Fig 1 and Fig 2      |         |  |
| 8                                                                                                                                                                                                                      | Detailed description of each exercise to enable replication                       |                         | Pages 8-9, rows 180-218<br>Fig 1 and Fig 2      |         |  |
| 9                                                                                                                                                                                                                      | Detailed description of any home programme component                              |                         | Does not apply                                  |         |  |
| 10                                                                                                                                                                                                                     | Describe whether there are any non-exercise components                            |                         | Does not apply                                  |         |  |
| 11                                                                                                                                                                                                                     | Describe the type and number of adverse events that occur during exercise         |                         | Does not apply                                  |         |  |
| 12                                                                                                                                                                                                                     | Describe the setting in which the exercises are performed                         |                         | Page 7, Row 170-171                             |         |  |
| 13                                                                                                                                                                                                                     | Detailed description of the exercise intervention                                 |                         | Pages 8-9, rows 180-218                         |         |  |

|     |                                                                            |  |                                                                                                                                       |  |  |
|-----|----------------------------------------------------------------------------|--|---------------------------------------------------------------------------------------------------------------------------------------|--|--|
|     |                                                                            |  | Fig 1 and Fig 2                                                                                                                       |  |  |
| 14a | Describe whether the exercises are generic (one size fits all) or tailored |  | Page 8, Rows 188-191<br>Page 8-9, Rows 200-208                                                                                        |  |  |
| 14b | Detailed description of how exercises are tailored to the individual       |  | Page 8, Rows 188-191<br>Page 8-9, Rows 200-208                                                                                        |  |  |
| 15  | Describe the decision rule for determining the starting level              |  | Page 8, Rows 188-193<br>Pages 8-9, Rows 200-206<br>Page 9 219-217<br>Fig 2 and Fig 3                                                  |  |  |
| 16a | Describe how adherence or fidelity is assessed/measured                    |  | <b>Adherence</b><br>Page 7, Rows 174-175<br>Page 12, Rows 272-275<br><b>Fidelity</b><br>Page 6, Rows 130-133<br>Page 13, Rows 293-299 |  |  |
| 16b | Describe the extent to which the intervention was delivered as planned     |  | Pages 8-9, rows 180-218<br>Fig 1 and Fig 2                                                                                            |  |  |
